# Supplementary material
Source: PubMed Central journal article supplement (PMC10654184)

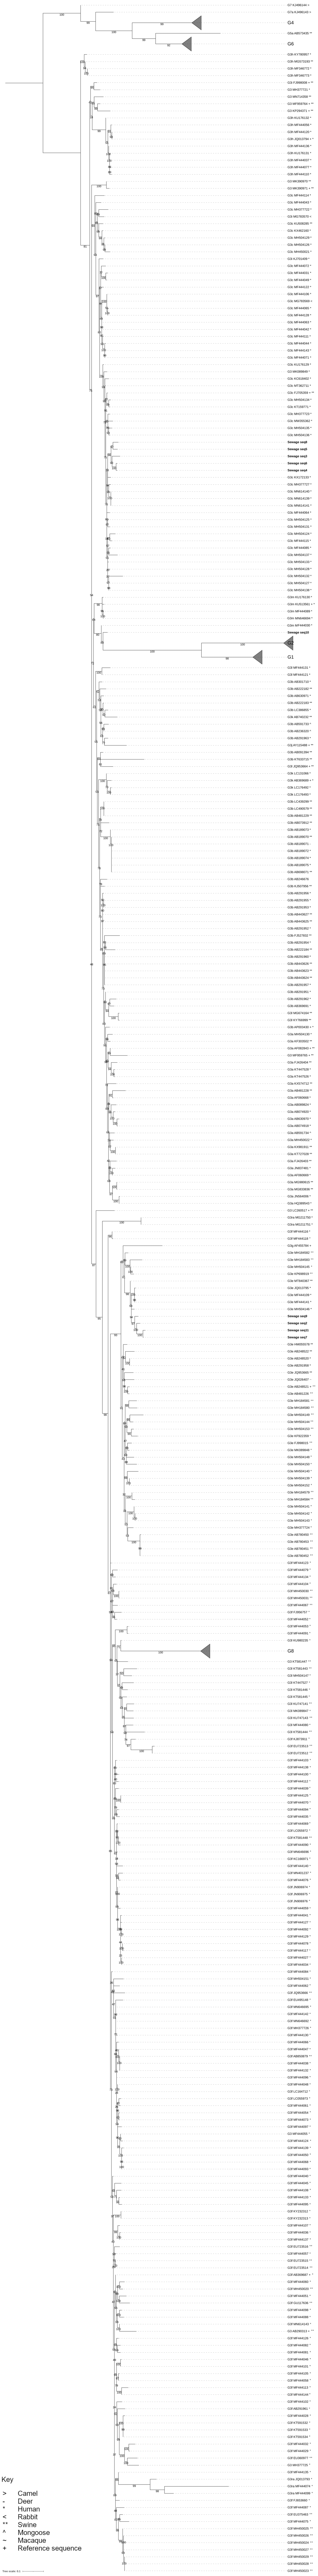

Supplement: 12560_2023_9569_MOESM10_ESM.pdf [file 12560_2023_9569_MOESM10_ESM.pdf]
